# Supplementary material for: Changes in Patient Experiences of Hospital Care During the COVID-19 Pandemic
Source: PubMed Central journal article supplement (PMC10457712; doi:10.1001/jamahealthforum.2023.2766), 2023-08-25
Supplement: jamahealthforum-e232766-s002.pdf [file jamahealthforum-e232766-s002.pdf]

## **Data Sharing Statement**

Elliott. Changes in Patient Experiences of Hospital Care During the COVID-19 Pandemic.  
*JAMA Health Forum*. Published August 25, 2023. doi:10.1001/jamahealthforum.2023.2766

### **Data**

**Data available:** No
